# Supplementary material for: Structural Models of Human eEF1A1 and eEF1A2 Reveal Two Distinct Surface Clusters of Sequence Variation and Potential Differences in Phosphorylation
Source: PubMed Central journal article supplement (PMC2712093; doi:10.1371/journal.pone.0006315), 2009-07-28
Supplement: pone.0006315.s001.pdf [file pone.0006315.s001.pdf]

**Supplementary file S1: Yeast crystal structure comparison.**

**(A)**

| <b>PDB ID</b> | <b>Reference</b> | <b>Resolution</b> | <b>eEF1A</b> | <b>eEF1B<math>\alpha</math></b> | <b>Ligand</b>        |
|---------------|------------------|-------------------|--------------|---------------------------------|----------------------|
| 1F60          | [1]              | 1.67 Å            | A: 2-441     | B: 1117-1206                    | -                    |
| 1G7C          | [2]              | 2.05 Å            | A: 4-443     | B: 1117-1206                    | GDPnP                |
| 1IJE          | [2]              | 2.4 Å             | A: 4-441     | B: 1117-1206                    | GDP                  |
| 1IJF          | [2]              | 3.0 Å             | A: 2-441     | B: 1117-1206                    | GDP-Mg <sup>2+</sup> |
| 2B7B          | [3]              | 2.6 Å             | A: 2-441     | B: 1117-1206 (K205A)            | GDP                  |
| 2B7C          | [3]              | 1.8 Å             | A: 5-441     | B: 1117-1206 (K205A)            | -                    |

**(B)**

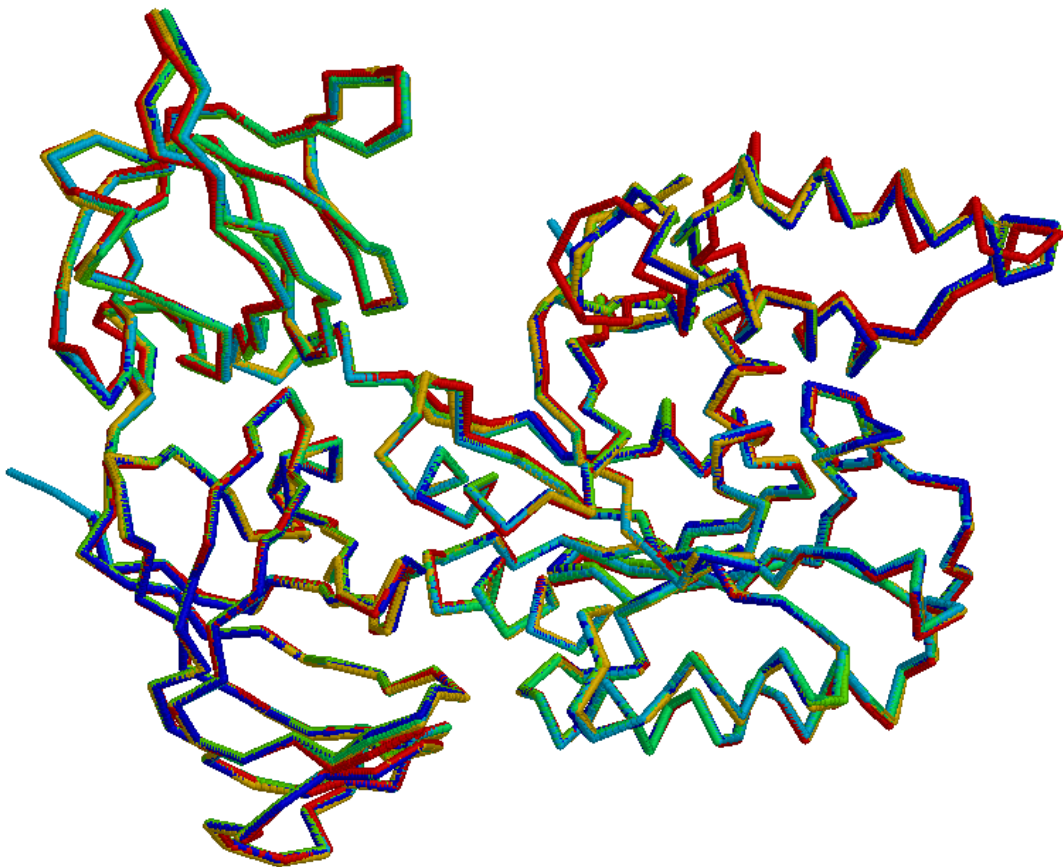

(C)

| <b>PDB ID</b> | <b>1F60</b>        | <b>1G7C</b>        | <b>1IJE</b>        | <b>1IJF</b>        | <b>2B7B</b>        | <b>2B7C</b> |
|---------------|--------------------|--------------------|--------------------|--------------------|--------------------|-------------|
| <b>1F60</b>   |                    |                    |                    |                    |                    |             |
| <b>1G7C</b>   | 0.26 Å<br>(438 aa) |                    |                    |                    |                    |             |
| <b>1IJE</b>   | 0.27 Å<br>(438 aa) | 0.18 Å<br>(438 aa) |                    |                    |                    |             |
| <b>1IJF</b>   | 0.13 Å<br>(440 aa) | 0.29 Å<br>(438 aa) | 0.30 Å<br>(438 aa) |                    |                    |             |
| <b>2B7B</b>   | 0.29 Å<br>(440 aa) | 0.33 Å<br>(438 aa) | 0.31 Å<br>(438 aa) | 0.32 Å<br>(440 aa) |                    |             |
| <b>2B7C</b>   | 0.69 Å<br>(437 aa) | 0.68 Å<br>(437 aa) | 0.68 Å<br>(437 aa) | 0.72 Å<br>(437 aa) | 0.70 Å<br>(437 aa) |             |

(A) Table depicting the six different yeast eEF1A crystal structures in the Protein Data Bank (PDB) [4], resolution, PDB chains and solved residue lengths, along with each of their corresponding interacting eEF1B $\alpha$  proteins and ligands. (B) MultiProt [5,6] structural superposition of all six eEF1A crystal structures highlights the structural conservation among them. Each structure color-coded differently. (C) Table depicting the pair-wise structural comparisons for all vs. all yeast crystal structures. The Combinatorial Extension [7] calculated C $\alpha$  root mean square deviation (RMSD) is shown in Angstroms Å along with the structural alignment length between the two proteins. The closeness of the structures is evident in this table.

#### References:

1. Andersen GR, Pedersen L, Valente L, Chatterjee I, Kinzy TG, et al. (2000) Structural basis for nucleotide exchange and competition with tRNA in the yeast elongation factor complex eEF1A:eEF1B $\alpha$ . Mol Cell 6: 1261-1266.
2. Andersen GR, Valente L, Pedersen L, Kinzy TG, Nyborg J (2001) Crystal structures of nucleotide exchange intermediates in the eEF1A-eEF1B $\alpha$  complex. Nat Struct Biol 8: 531-534.

3. Pittman YR, Valente L, Jeppesen MG, Andersen GR, Patel S, et al. (2006) Mg<sup>2+</sup> and a key lysine modulate exchange activity of eukaryotic translation elongation factor 1B alpha. *J Biol Chem* 281: 19457-19468.
4. Berman HM, Westbrook J, Feng Z, Gilliland G, Bhat TN, et al. (2000) The Protein Data Bank. *Nucleic Acids Res* 28: 235-242.
5. Shatsky M, Nussinov R, Wolfson HJ (2002) MultiProt - A multiple protein structural alignment algorithm. *Algorithms in Bioinformatics, Proceedings* 2452: 235-250.
6. Shatsky M, Nussinov R, Wolfson HJ (2004) A method for simultaneous alignment of multiple protein structures. *Proteins-Structure Function and Bioinformatics* 56: 143-156.
7. Shindyalov IN, Bourne PE (1998) Protein structure alignment by incremental combinatorial extension (CE) of the optimal path. *Protein Eng* 11: 739-747.
