# Supplementary material for: Structural Models of Human eEF1A1 and eEF1A2 Reveal Two Distinct Surface Clusters of Sequence Variation and Potential Differences in Phosphorylation
Source: PubMed Central journal article supplement (PMC2712093; doi:10.1371/journal.pone.0006315), 2009-07-28
Supplement: pone.0006315.s002.pdf [file pone.0006315.s002.pdf]

**Supplementary file S2: Ramachandran evaluation plots for models of human eEF1A1 and eEF1A2.**

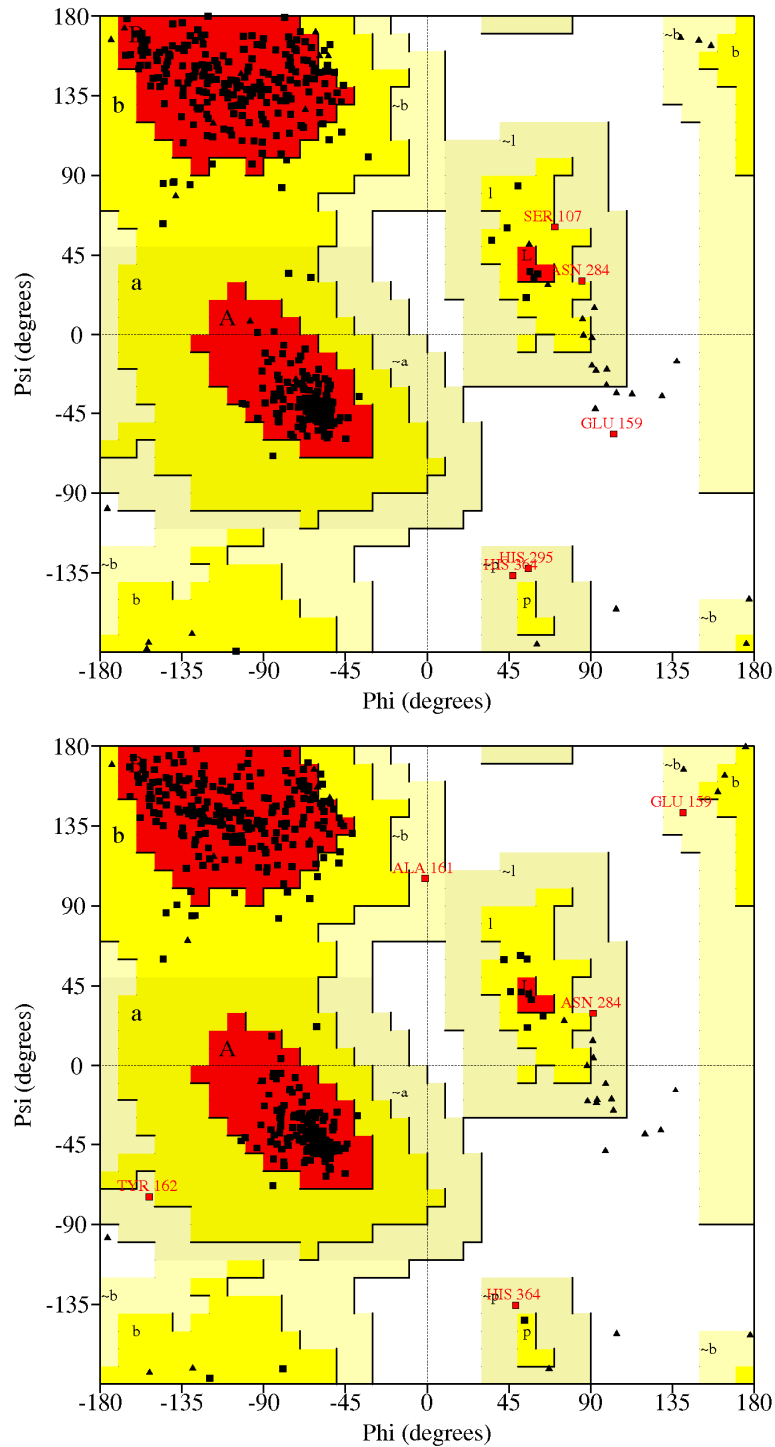

**Top:** Ramachandran plot scores for eEF1A1: most favored regions: 93.6%; additional allowed regions: 5.1%; generously allowed regions: 1.1%; disallowed regions: 0.3%.

**Bottom:** Ramachandran plot scores for eEF1A2: most favored regions: 92%; additional allowed regions: 6.7%; generously allowed regions: 1.3%; disallowed regions: 0%. Ideally, one would hope to have >90% residues in the “most favored” regions of the Ramachandran plot [1,2].

**References:**

1. Morris AL, MacArthur MW, Hutchinson EG, Thornton JM (1992) Stereochemical quality of protein structure coordinates. *Proteins* 12: 345-364.
2. Laskowski RA, MacArthur MW, Moss DS, Thornton JM (1993) Procheck - a Program to Check the Stereochemical Quality of Protein Structures. *Journal of Applied Crystallography* 26: 283-291.
